# Supplementary material for: A novel mode of enhancer evolution: The Tal1 stem cell enhancer recruited a MIR element to specifically boost its activity
Source: HighWire-hosted journal article supplement (doi:10.1101/gr.077008.108), 2008-08-07
Supplement: Smith_SupplementaryFig1.pdf [file Smith_SupplementaryFig1.pdf]

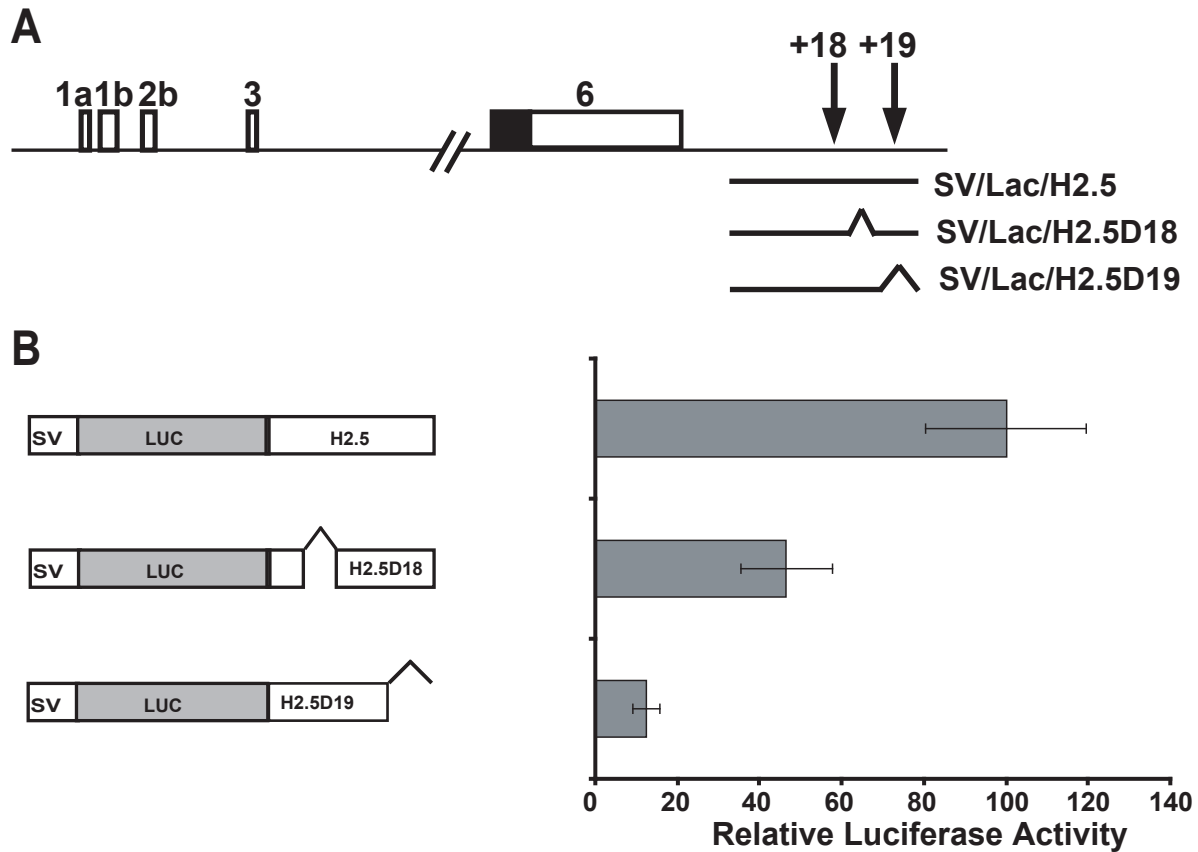

Smith et al, Supp Fig 1

**Supplementary Figure 1:** A) Schematic of the SCL locus indicating the positions of the 0.9E3 SCL promoter, the 2.5 kb 3' SCL enhancer region and the +18 and +19 deletion constructs. B) Deletion of the +18 region reduces the activity of the 2.5kb SCL enhancer. Shown on the left are the deletion constructs for the +18 region and the +19 regions. Deletion constructs were analysed in 416B stable transfections and data is presented relative to the activity of the full 2.5 kb 3' SCL enhancer.
