# Supplementary material for: A novel mode of enhancer evolution: The Tal1 stem cell enhancer recruited a MIR element to specifically boost its activity
Source: HighWire-hosted journal article supplement (doi:10.1101/gr.077008.108), 2008-08-07
Supplement: smith_SupplementaryFig2.pdf [file smith_SupplementaryFig2.pdf]

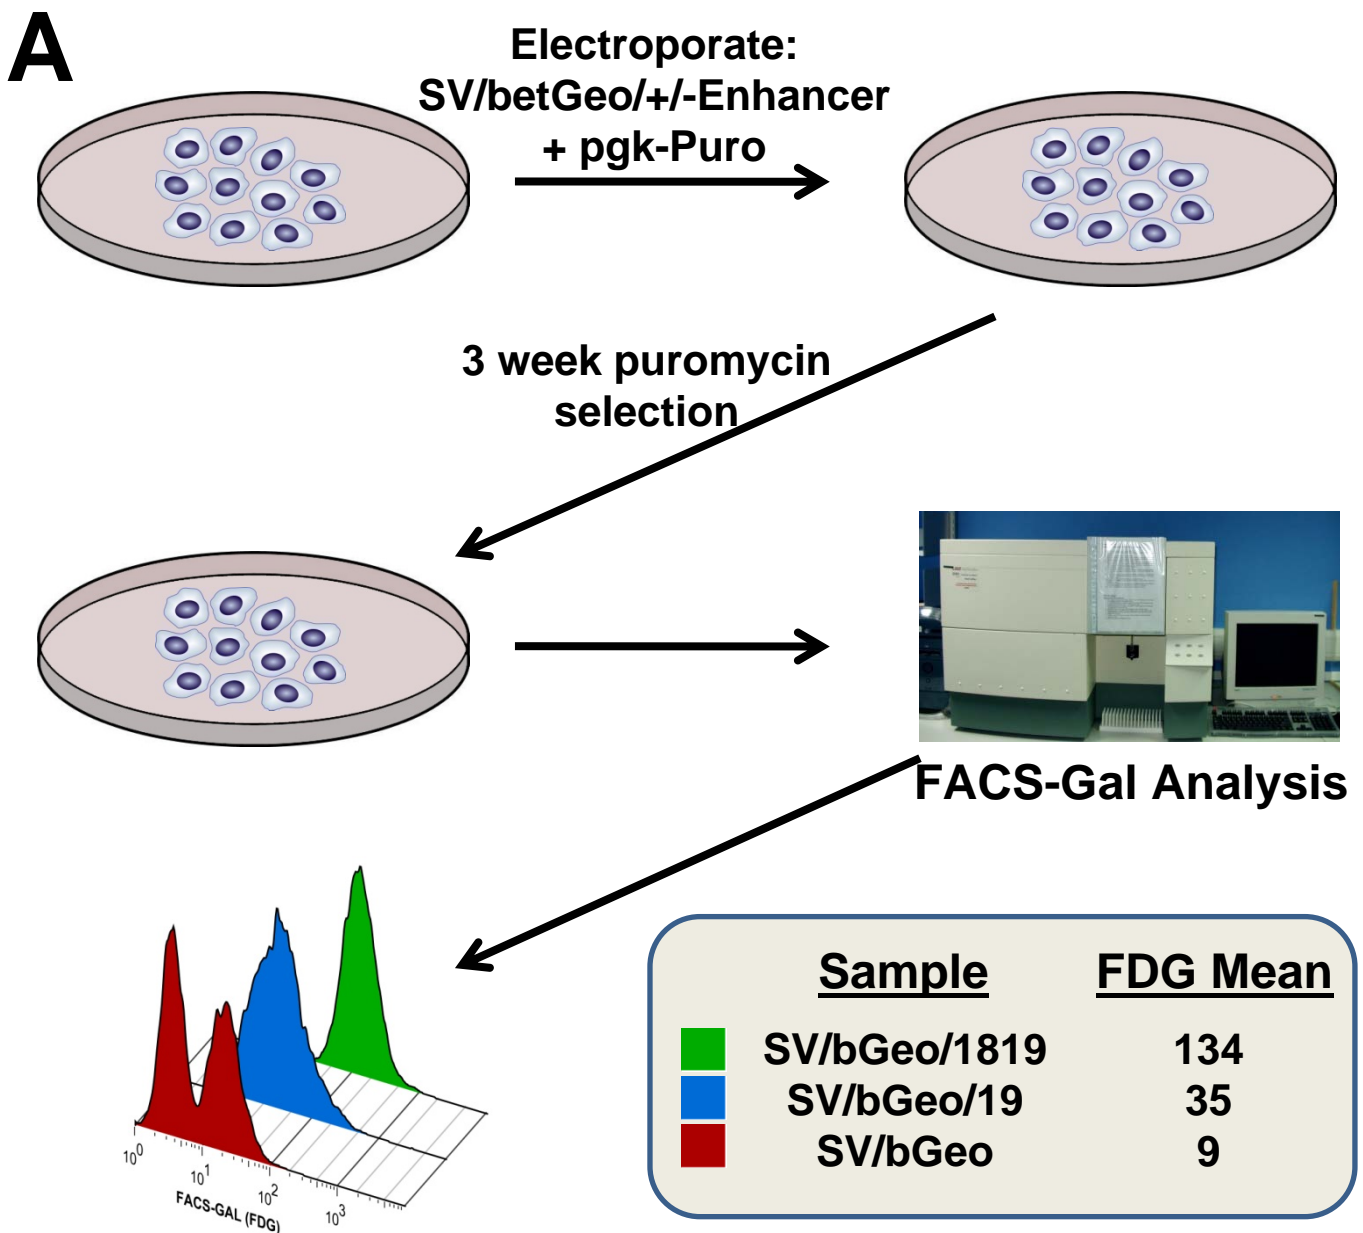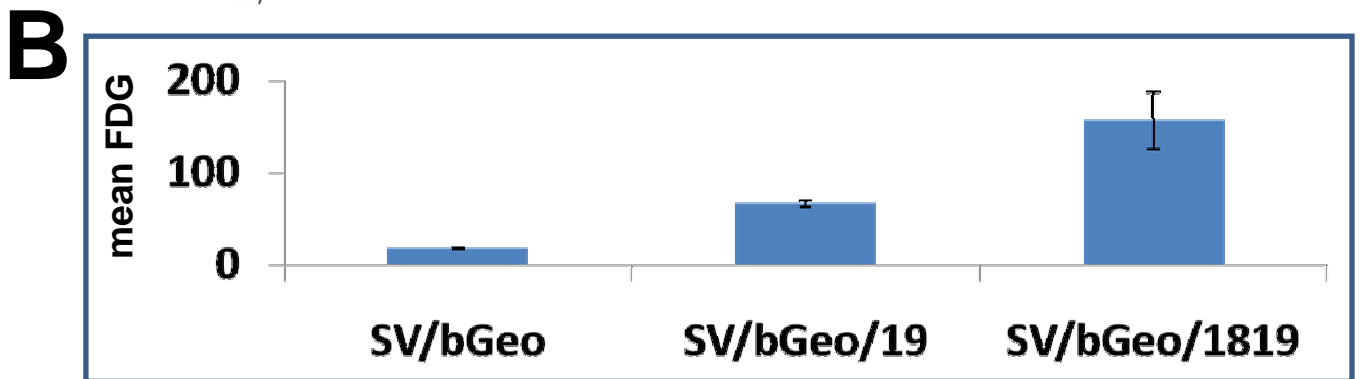

**Supplementary Figure 2: Flow cytometric analysis demonstrates that the +18 region increases transcriptional activity of the Scl +19 enhancer when stably integrated into chromatin.** A) Beta-geo reporter constructs were introduced into 416B cells by electroporation and pools of stably transfected cells obtained following three weeks of puromycin selection. Pools of selected cells were analysed by flow cytometry using the fluorescent lacZ substrate FDG as described (Sanchez et al, 1999, *Development*, 126: 3891-904). B) Summary graph displaying results from two independent sets of stable transfections.
