# Supplementary material for: A novel mode of enhancer evolution: The Tal1 stem cell enhancer recruited a MIR element to specifically boost its activity
Source: HighWire-hosted journal article supplement (doi:10.1101/gr.077008.108), 2008-08-07
Supplement: Smith_SupplementaryFig3.pdf [file Smith_SupplementaryFig3.pdf]

**A**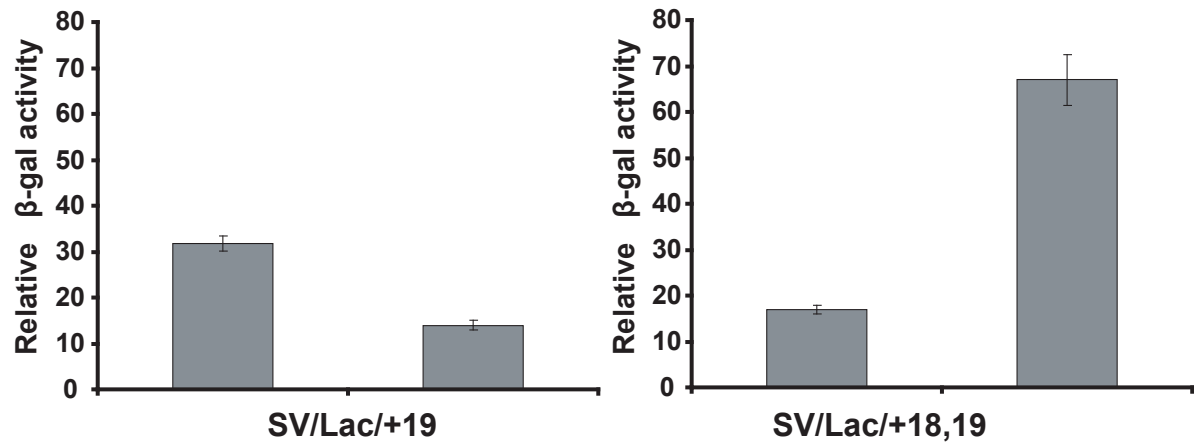

Smith et al, Supp Fig 3

**Supplementary Figure 3:** A) ES cells expressing SV/Lac, SV/Lac/+19 and SV/Lac/+18,+19 were differentiated towards the haematopoietic lineage. LacZ activity was assessed by colorimetric assay using the synthetic  $\beta$ -galactosidase substrate ONPG at days 3 and 8 of differentiation. Experiments were performed in triplicate and data is presented as mean LacZ activity per  $1 \times 10^6$  cells plotted relative to the SV/Lac control.
