# Supplementary material for: A novel mode of enhancer evolution: The Tal1 stem cell enhancer recruited a MIR element to specifically boost its activity
Source: HighWire-hosted journal article supplement (doi:10.1101/gr.077008.108), 2008-08-07
Supplement: smith_SupplementaryFig4.pdf [file smith_SupplementaryFig4.pdf]

**A**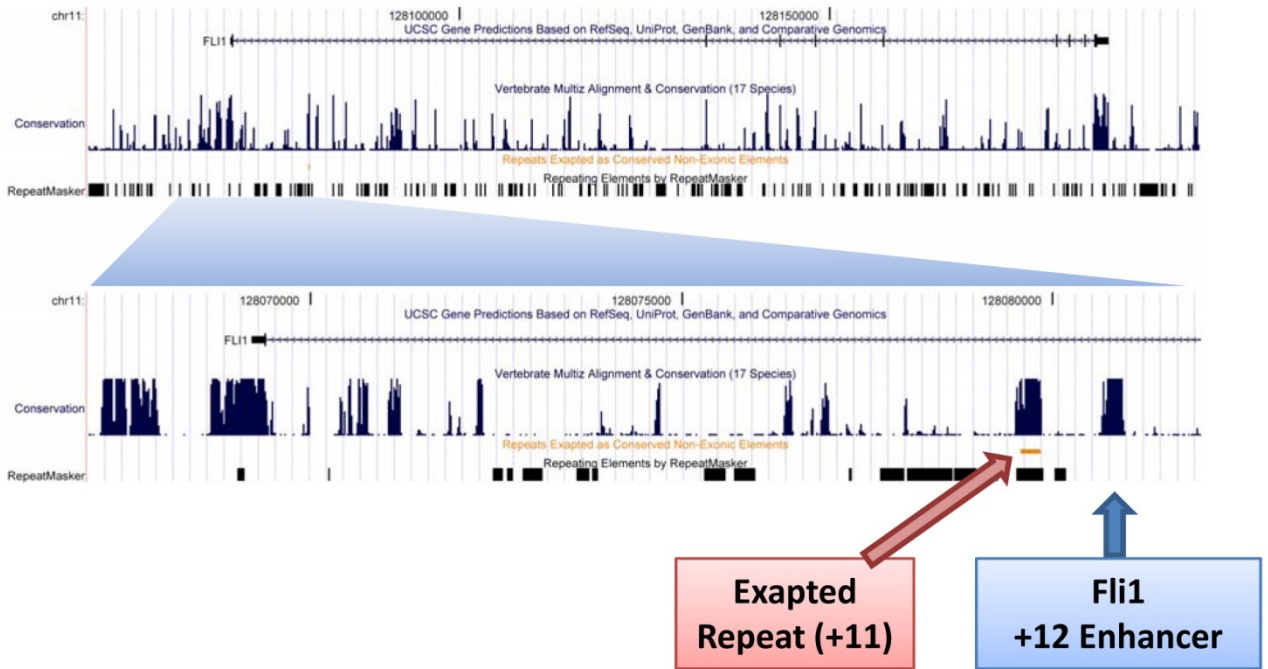**B**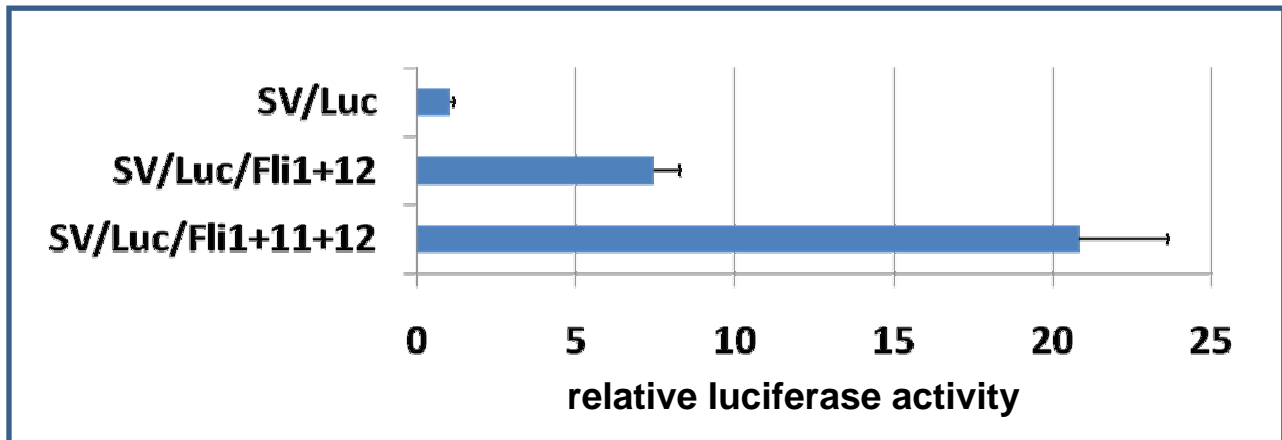

**Supplementary Figure 4: Activity of the Fli1 +12 blood stem cell enhancer (Pimanda et al, 2007, PNAS 104(45): 17692-17697) can be enhanced in stable transfection assays by inclusion of an exapted MER repeat located less than 1 kb 5' of the +12 enhancer.. A) UCSC genome browser view of the human Fli1 locus (150 kb at the top, 15 kb zoomed in below) showing that there is an exapted repeat immediately upstream of the Fli1 +12 blood stem cell enhancer. The repeat in question was identified as part of a recent genome-wide study (Lowe et al, 2007, PNAS 104(19):8005-10). B) Results of stable transfection assays demonstrating that inclusion of the Fli1 +11 exapted repeat region results in three to four-fold enhancement of the activity of the Fli1 +12 stem cell enhancer.**
