# Supplementary material for: A novel mode of enhancer evolution: The Tal1 stem cell enhancer recruited a MIR element to specifically boost its activity
Source: HighWire-hosted journal article supplement (doi:10.1101/gr.077008.108), 2008-08-07
Supplement: smith_supplementaryFig5.pdf [file smith_supplementaryFig5.pdf]

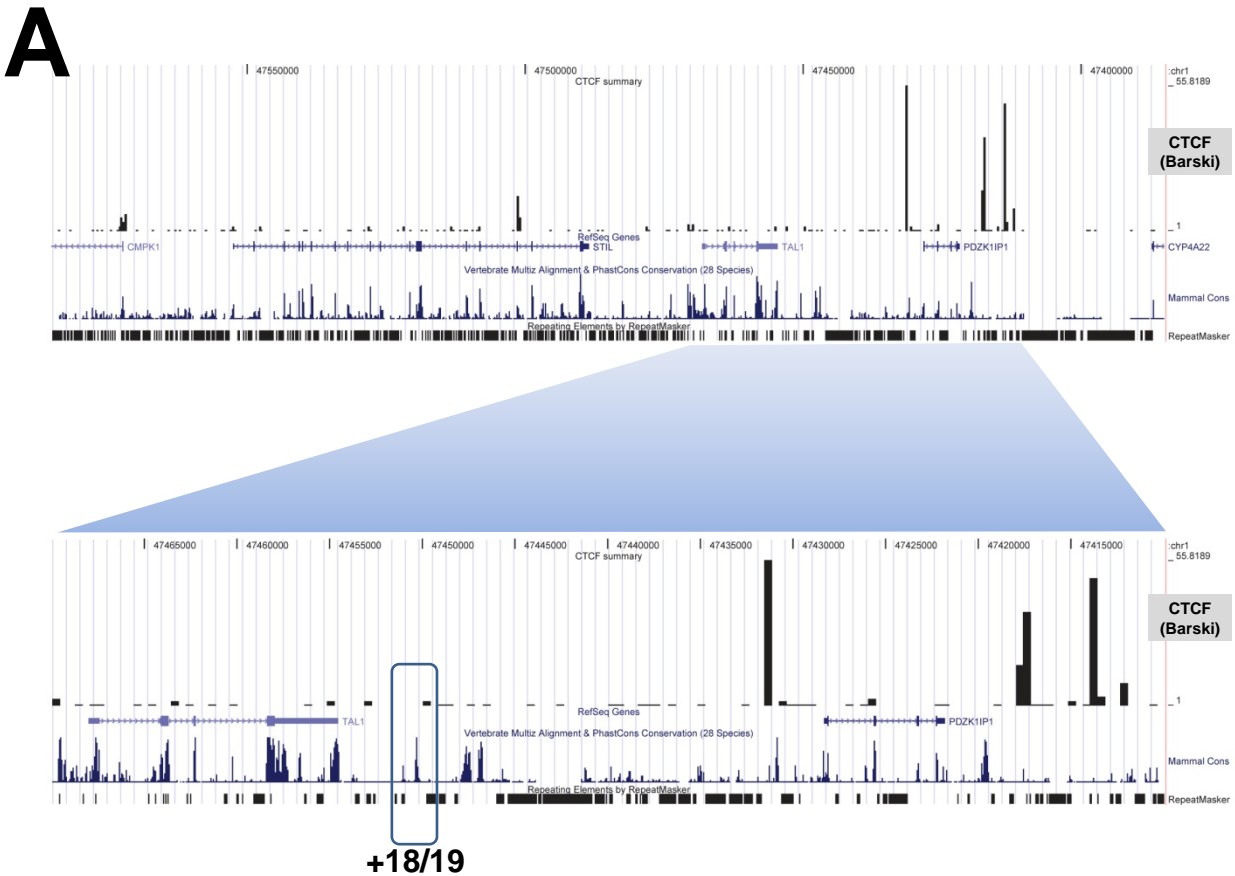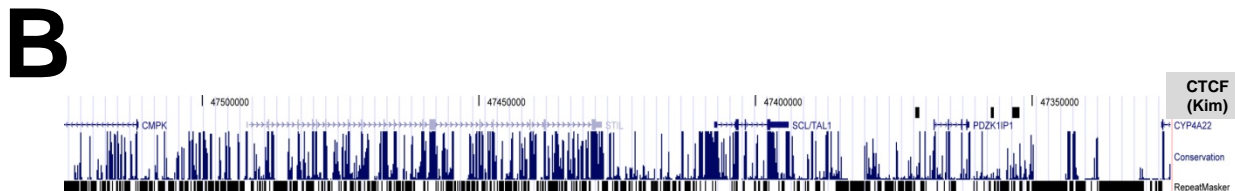

**Supplementary Figure 5: No evidence for CTCF binding to the *Scf/Tal1* +18 and +19 regions.** A) UCSC genome browser view of the human *Scf/Tal1* locus (200 kb at the top, 60 kb zoomed in below) including a custom track with CTCF ChIP-Seq data from human CD4 T cells (Barski et al 2007, Cell 129(4): 823-837). Strong CTCF binding is seen either side of the *MAP17* (*PDZK1iP1*) gene corresponding to the presence of sequence motifs matching recently described CTCF consensus binding sites. However, no CTCF binding is seen in the +18/19 region. B) UCSC genome browser view of the human *Scf/Tal1* locus (200 kb at the top) including a custom track with CTCF ChIP-Seq peaks in human fibroblasts (Kim et al 2007, Cell 128(6):1231-1245.). Strong CTCF binding is seen either side of the *MAP17* (*PDZK1iP1*) gene in the same regions bound in CD4 T-cells, but again no CTCF binding is seen in the +18/19 region.
